# Supplementary material for: Hepatocyte SHP-1 is a Critical Modulator of Inflammation During Endotoxemia
Source: PubMed Central journal article supplement (PMC5440389; doi:10.1038/s41598-017-02512-7), 2017-05-22

## Supplementary information

### Hepatocyte SHP-1 is a Critical Modulator of Inflammation During Endotoxemia

Anupam Adhikari<sup>1,2</sup>, Caroline Martel<sup>1,2</sup>, André Marette<sup>3</sup> and Martin Olivier<sup>1,2\*</sup>

<sup>1</sup>Department of Medicine, Microbiology and Immunology, Faculty of Medicine, McGill University, Montréal, Québec, Canada; <sup>2</sup>The Research Institute of the McGill University Health Centre and Infectious Diseases and Immunity in Global Health Program, Montréal, Québec, Canada; <sup>3</sup>Heart and Lung Institute (Laval Hospital), Université Laval, Québec, QC, Canada.

\*Corresponding author:

Martin Olivier, Ph.D.

1001 Boul. Décarie

The Research Institute of the McGill University Health Centre

Site Glen, Pavillon E/Block E

Montréal, Qc, H4A 3J1, Canada

E-mail: [martin.olivier@mcgill.ca](mailto:martin.olivier@mcgill.ca)

Supplementary Figure 1.

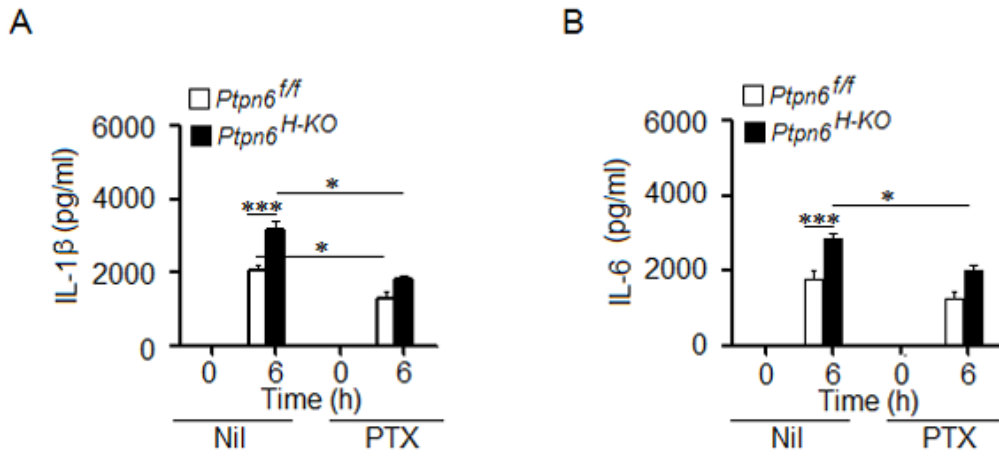

Supplementary Figure 1. TNF- $\alpha$  inhibitor pentoxifylline treatment reduced pro-inflammatory cytokines in *Ptpn6*<sup>H-KO</sup> challenged with LPS. Serum levels of (A) IL-1 $\beta$  and (B) IL-6 in *Ptpn6*<sup>H-KO</sup> and *Ptpn6*<sup>f/f</sup> mice treated with pentoxifylline, during LPS challenge (30 mg/kg body weight). Data are presented as mean  $\pm$  SEM,  $n = 6$ . \*  $P \leq 0.05$ , and \*\*\* $P \leq 0.001$ .

## Supplementary Figure 2

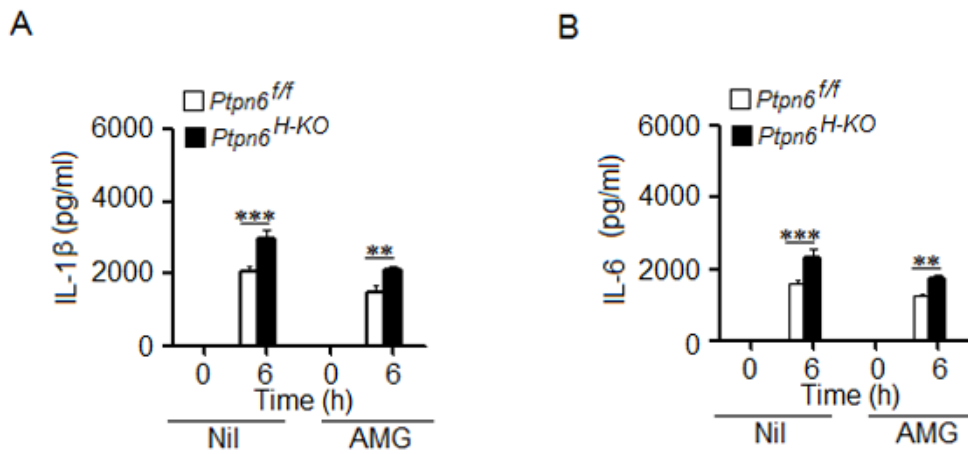

**Supplementary Figure 2. Effect of iNOS/NO inhibitor aminoguanidine treatment on pro-inflammatory cytokines in *Ptpn6*<sup>H-KO</sup> challenged with LPS.** Serum levels of (A) IL-1β and (B) IL-6 in *Ptpn6*<sup>H-KO</sup> and *Ptpn6*<sup>f/f</sup> mice treated with aminoguanidine, during LPS challenge (30 mg/kg body weight). Data are presented as mean ± SEM,  $n = 6$  \*\*\* $P \leq 0.001$ .

### Supplementary Figure 3

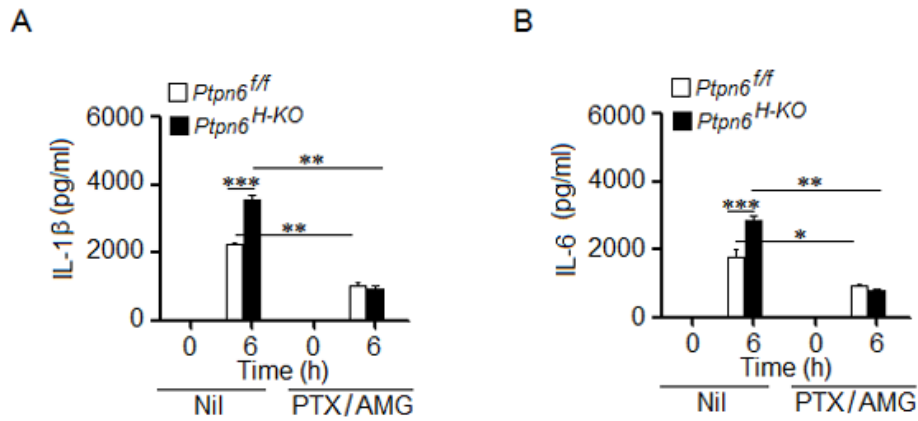

**Supplementary Figure 3. Combination of TNF- $\alpha$  and iNOS/NO inhibitors treatment reduced pro-inflammatory cytokines in *Ptpn6*<sup>H-KO</sup> challenged with LPS.** Serum levels of (A) IL-1 $\beta$  and (B) IL-6 in *Ptpn6*<sup>H-KO</sup> and *Ptpn6*<sup>ff</sup> mice treated with aminoguanidine plus pentoxifyline during LPS challenge (30 mg/kg body weight). Data are presented as mean  $\pm$  SEM,  $n = 6$ . \*  $P \leq 0.05$ , \*\* $P \leq 0.01$  and \*\*\* $P \leq 0.001$ .

**Supplementary Figure 4.**

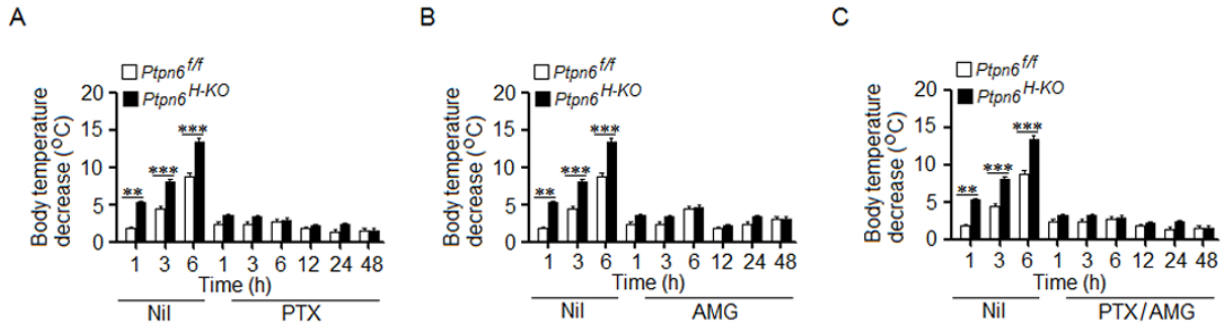

**Supplementary Figure 4. Effect of TNF- $\alpha$  or NO inhibitors on body temperature of *Ptpn6<sup>H-KO</sup>* and the *Ptpn6<sup>f/f</sup>* mice** Body temperature decrease in *Ptpn6<sup>H-KO</sup>* and *Ptpn6<sup>f/f</sup>* mice treated with (A) pentoxifyline (B) amino guanidine and (C) their combination during LPS challenge (30 mg/kg body weight). No significant differences in body temperature reduction between *Ptpn6<sup>H-KO</sup>* and *Ptpn6<sup>f/f</sup>* mice at the indicated time points. Data are presented as mean  $\pm$  SEM,  $n = 6$ . \*\* $P \leq 0.01$  and \*\*\* $P \leq 0.001$ .

Supplementary Information File 1

Supplementary information

①

Full length  
blot of  
Figure  
2. E  
iNOS  
and  
 $\beta$ -Actin.

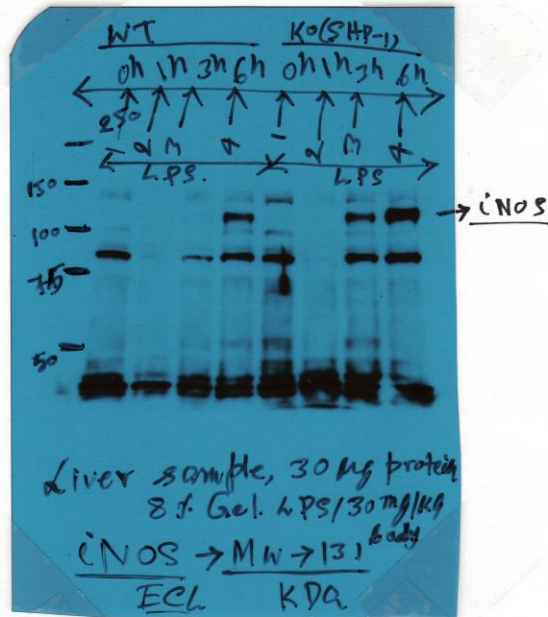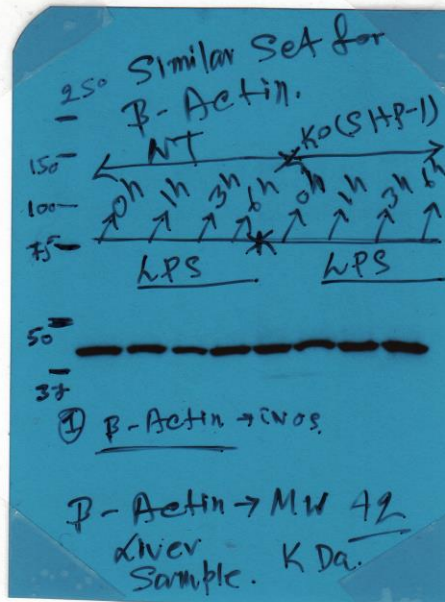

Supplementary Information File 2

Supplementary information ②

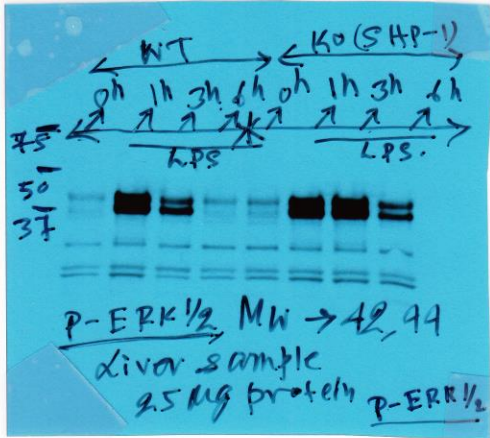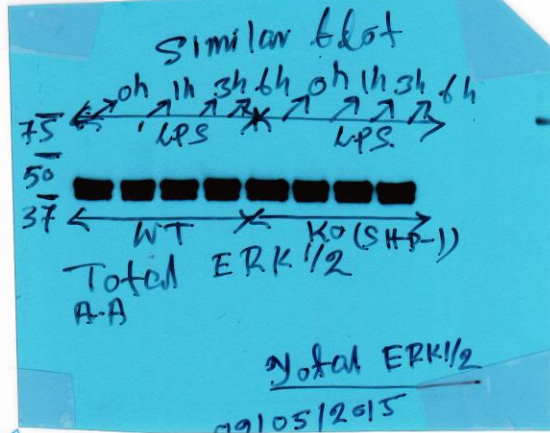

Full length blot of figure 2.F (MAPK pathway)

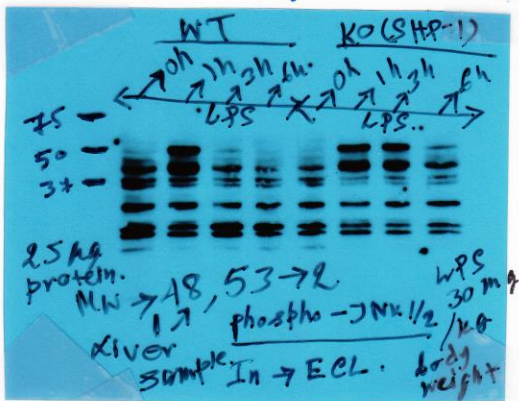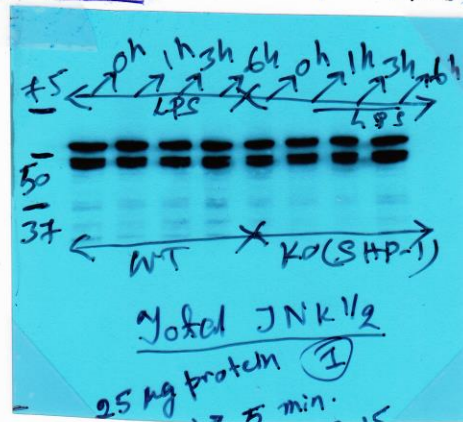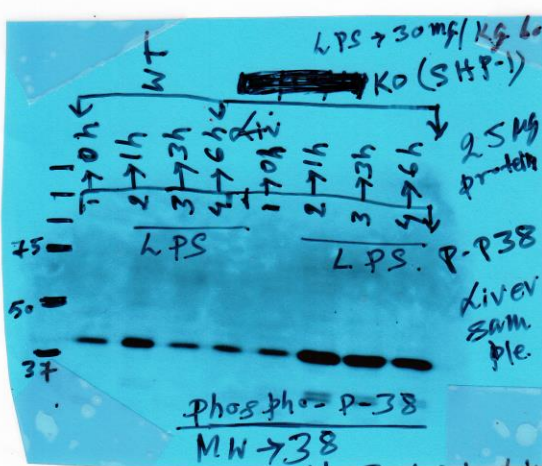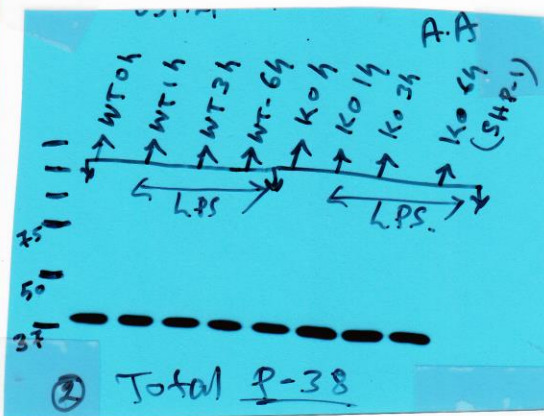



Supplementary information ③

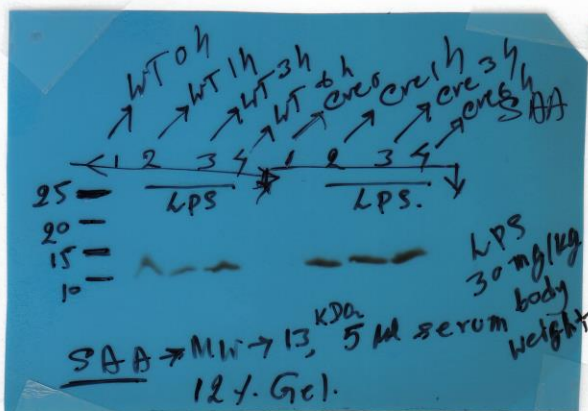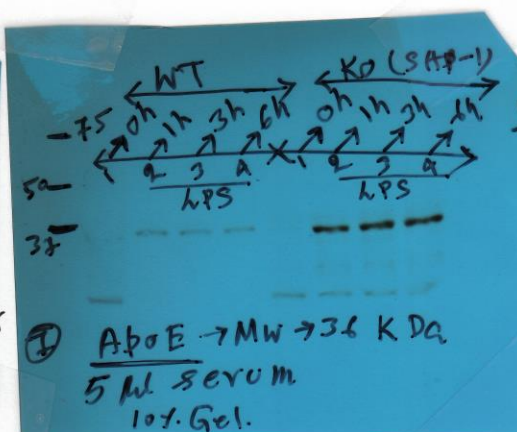

Full length blot of figure in 2.G (SAA, ApoE, LBP, Albumin) in serum

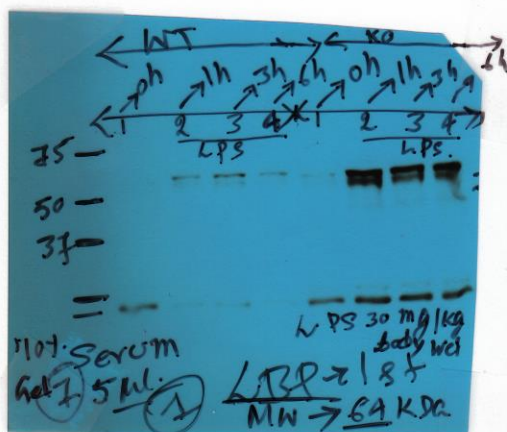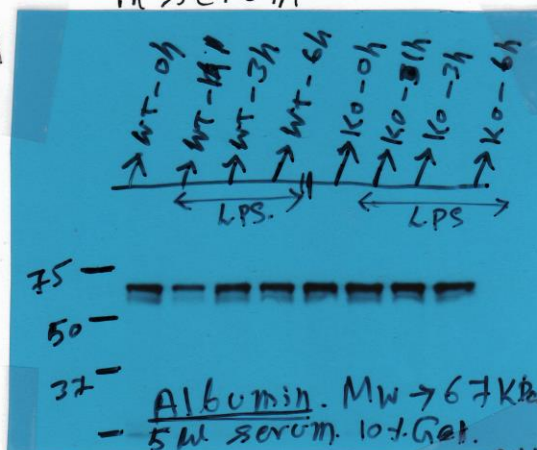



Supplementary Information File 4

Supplementary information (4)

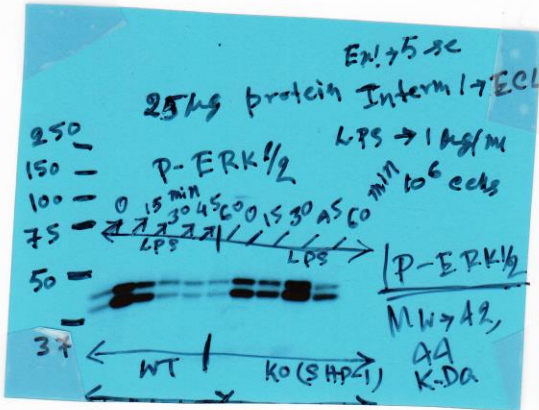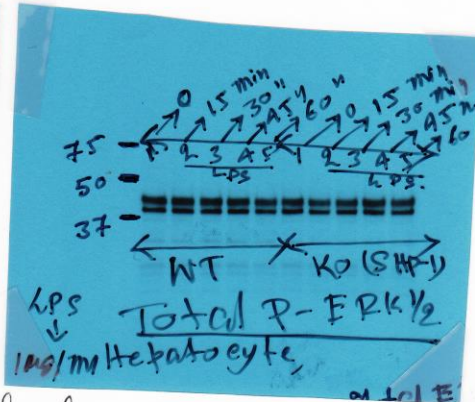

Full length blot of figure 5. (MAPK path way in Hepato cyte)

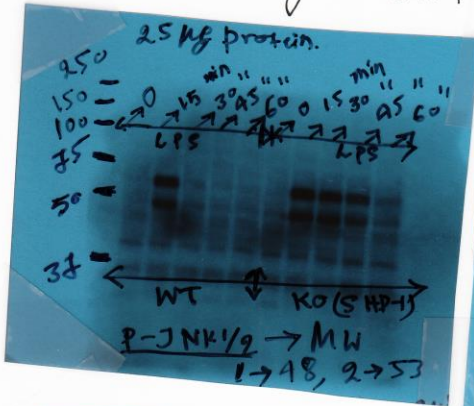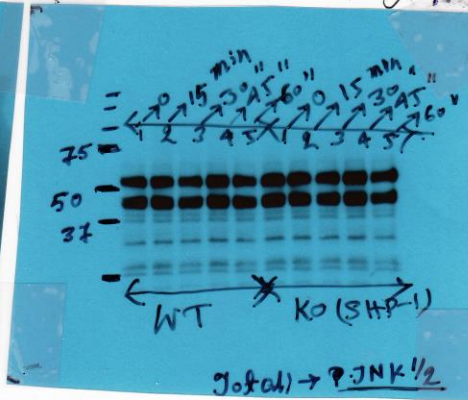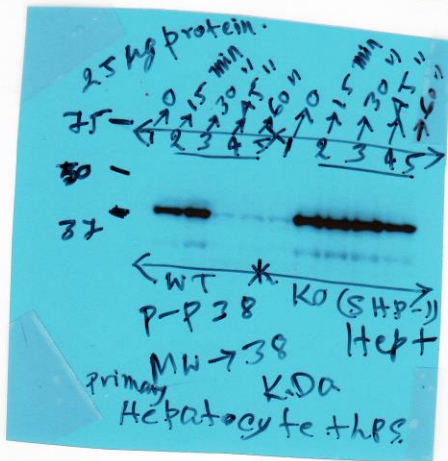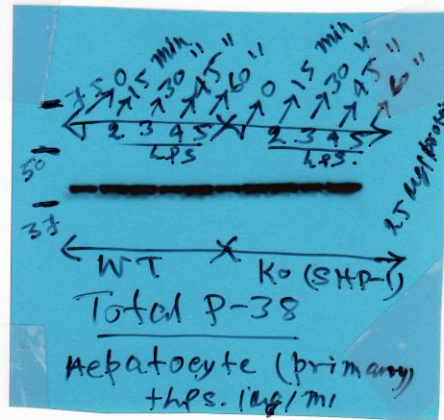

Supplementary Information (5)

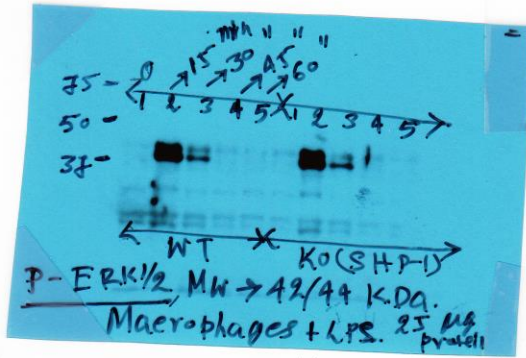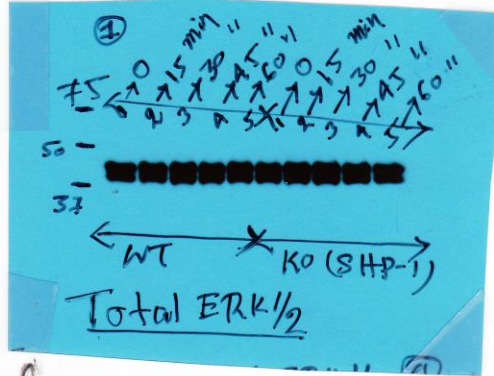

Full length blot of  
25 µg protein.

figure 5 (MAPK pathway  
in macrophages)

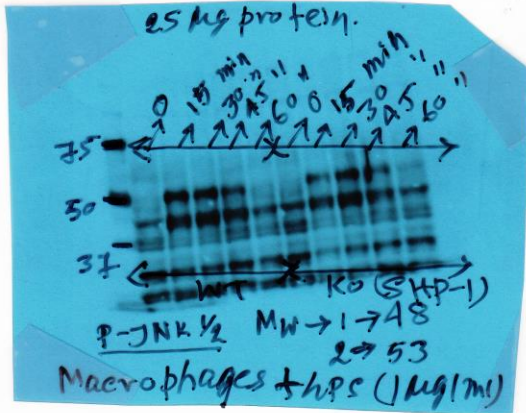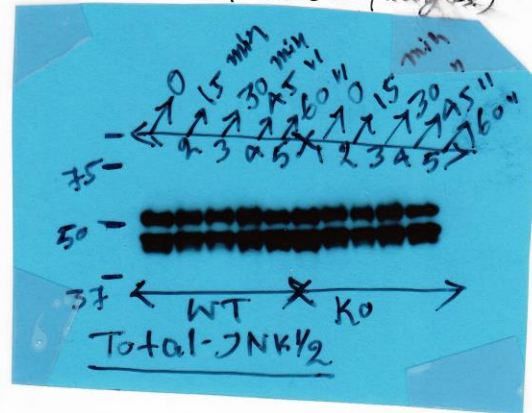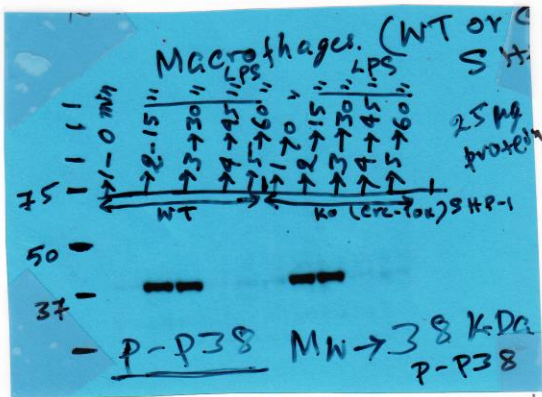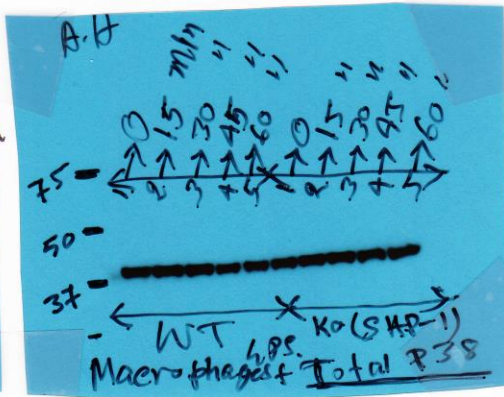

Supplement: 41598_2017_2512_MOESM1_ESM.pdf [file 41598_2017_2512_MOESM1_ESM.pdf]
